# Supplementary material for: β-Cyclodextrin-modified silver nanoparticles as colorimetric probes for the direct visual enantioselective recognition of aromatic α-amino acids
Source: Royal Society of Chemistry journal article supplement (doi:10.1039/c6ay01308b), 2016-01-01
Supplement: c6ay01308b1.pdf [file c6ay01308b1.pdf]

Supplementary information

**$\beta$ -cyclodextrin–modified silver nanoparticles as  
colorimetric probes for direct visual enantioselective  
recognition of aromatic  $\alpha$ -amino acids**

**Cunwei Liu, Jinyu Lian, Qiang Liu, Chunli Xu and Baoxin Li\***

*Key laboratory of Analytical Chemistry for Life Science of Shaanxi  
Province, School of Chemistry & Chemical Engineering, Shaanxi Normal  
University, Xi'an 710119, China*

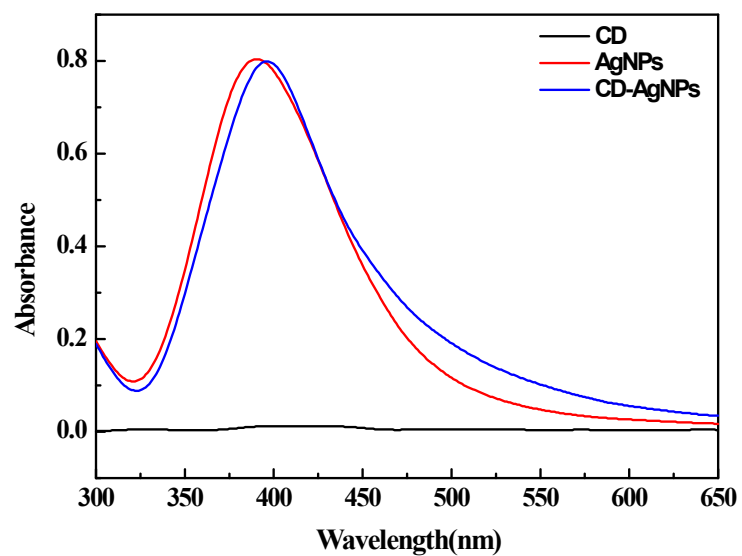

**Figure S1.** UV-vis absorption spectra of CD, AuNPs and  $\beta$ -CD-functionalized AgNPs.

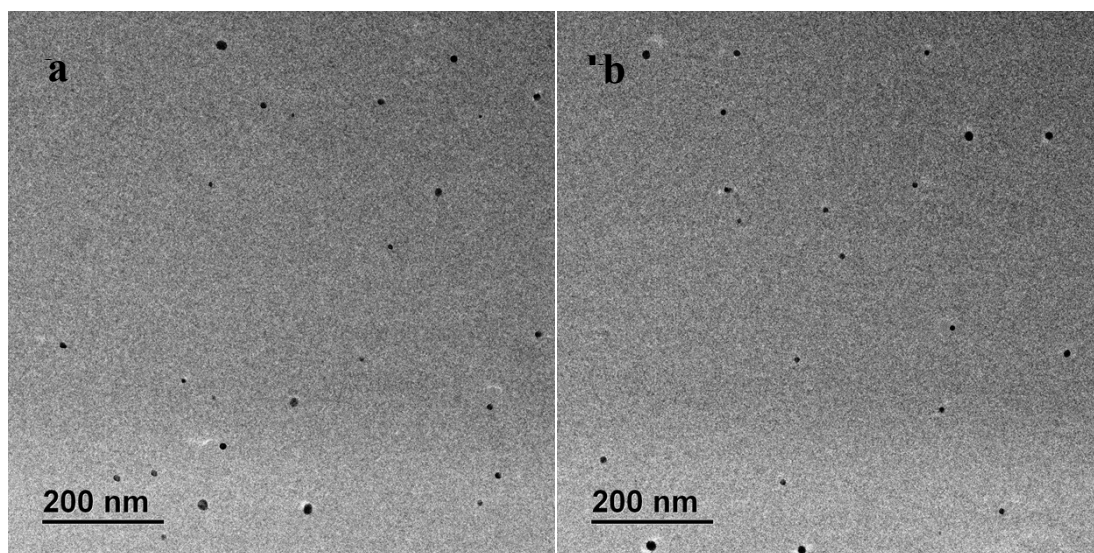

**Figure S2.** TEM images of AgNPs (a) and  $\beta$ -CD functionalized AgNPs (b).

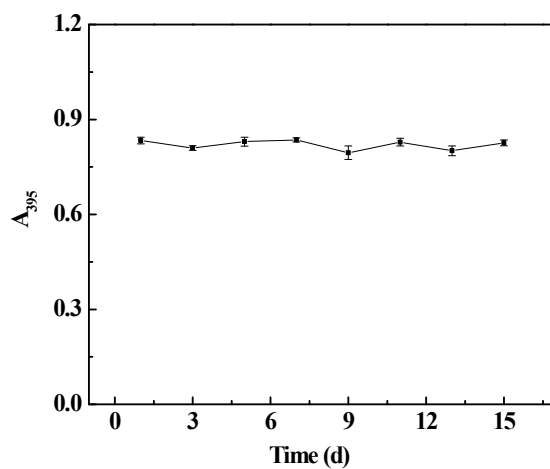

**Figure S3.** Absorption of  $\beta$ -CD-functionalized AgNPs affected by day at 395 nm.

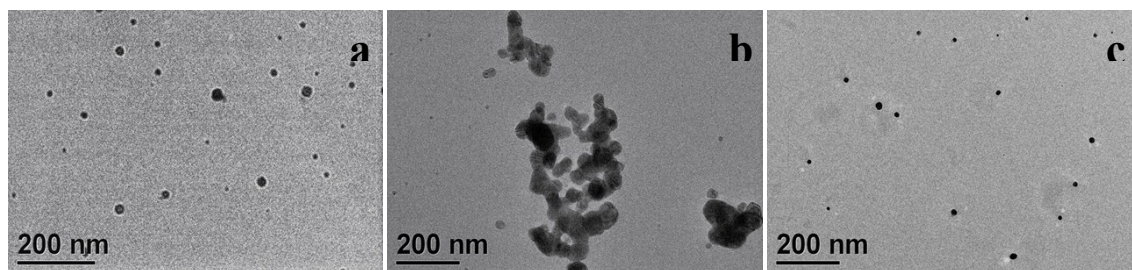

**Figure S4.** TEM images of  $\beta$ -CD functionalized AgNPs (a),  $\beta$ -CD functionalized AgNPs in the presence of 7 mM D-Phe (b), and  $\beta$ -CD functionalized AgNPs in the presence of 7 mM L-Phe (c).

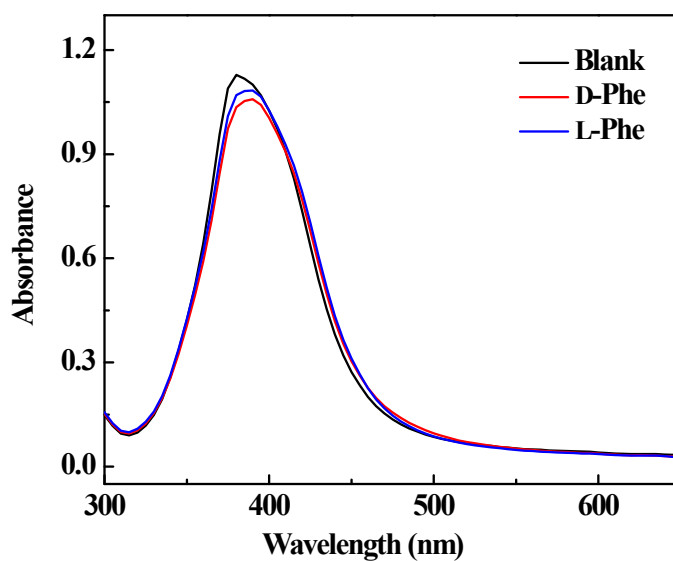

**Figure S5.** Absorption spectra of unmodified AgNPs in the presence of D-Phe or L-Phe. Experiment condition: 100  $\mu$ L 10 mM PBS buffer (pH 7.0), 240  $\mu$ L AgNPs (0.17 nM), 60  $\mu$ L H<sub>2</sub>O, 100  $\mu$ L Phe (7 mM).

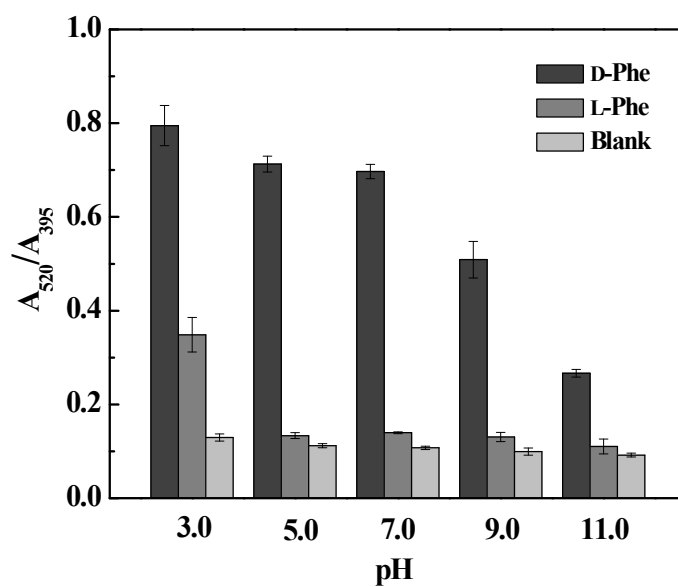

**Figure S6.** Plots of  $A_{520}/A_{395}$  ratio of  $\beta$ -CD-functionalized AgNPs upon the addition of D- or L-Phe at different pH.

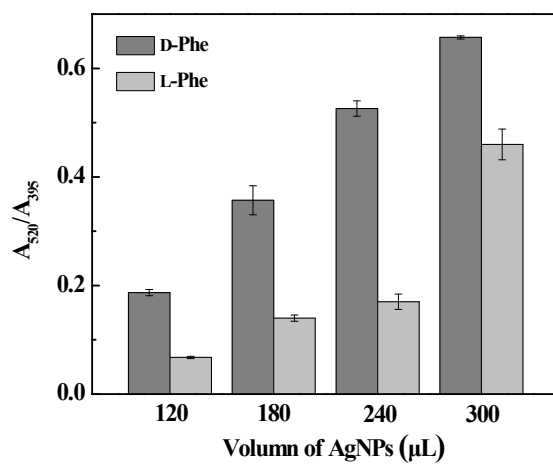

**Figure S7.** Effect of AgNPs amount (0.13 nM) on the absorption ratio ( $A_{520}/A_{395}$ ) in the presence of D- or L-Phe.

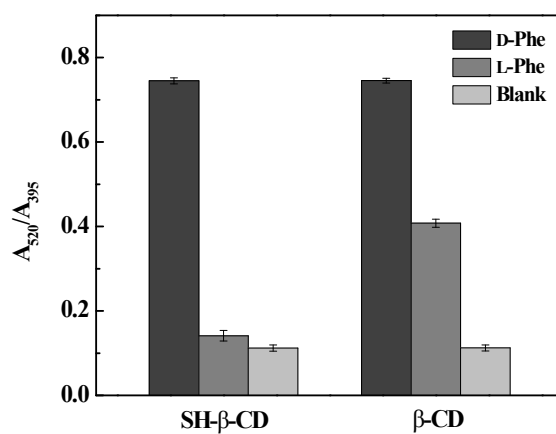

**Figure S8.** Plots of  $A_{520}/A_{395}$  ratio of the AgNPs using SH- $\beta$ -CD and  $\beta$ -CD as modifying reagent in the presence of D- or L-Phe.

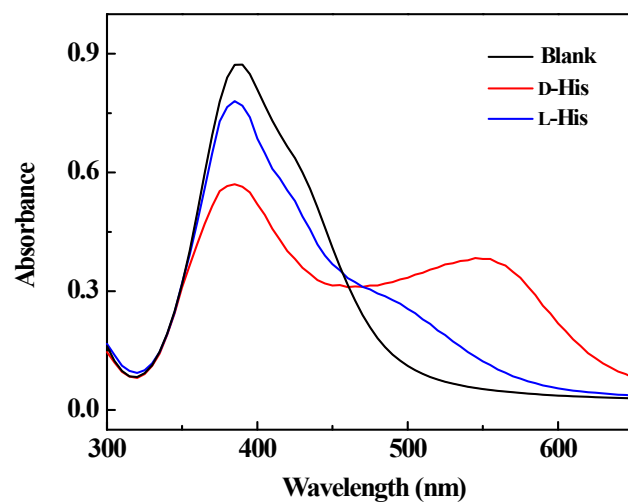

**Figure S9.** UV-vis absorption spectra of  $\beta$ -CD functionalized AgNPs upon the addition of 7 mM D- or L-His.
